# Supplementary material for: Retrosynthetic accessibility score (RAscore) – rapid machine learned synthesizability classification from AI driven retrosynthetic planning
Source: PubMed Central journal article supplement — Chem Sci. 2021 Jan 22;12(9):3339–49. doi: 10.1039/d0sc05401a (PMC8179384; doi:10.1039/d0sc05401a), 2021-01-22
Supplement: SC-012-D0SC05401A-s036.pdf [file SC-012-D0SC05401A-s036.pdf]

## Supporting Information

# Retrosynthetic Accessibility Score (RAscore) - Rapid Machine Learned Synthesizability Classification from AI Driven Retrosynthetic Planning

Amol Thakkar,<sup>1 2 \*</sup> Veronika Chadimová,<sup>1</sup> Esben Jannik Bjerrum,<sup>1</sup> Ola Engkvist,<sup>1</sup> and Jean-Louis Reymond<sup>2</sup>

<sup>1</sup> Hit Discovery, Discovery Sciences, R&D, AstraZeneca, Gothenburg, 431 50, Sweden.

<sup>2</sup> Department of Chemistry and Biochemistry, University of Bern, Bern, CH-3012, Switzerland.

\*Corresponding authors: [amol.thakkar@dcb.unibe.ch](mailto:amol.thakkar@dcb.unibe.ch), [jean-louis.reymond@dcb.unibe.ch](mailto:jean-louis.reymond@dcb.unibe.ch)

## Contents

|                                                                                                                                                   |   |
|---------------------------------------------------------------------------------------------------------------------------------------------------|---|
| Retrosynthetic Accessibility Score (RAscore) - Rapid Machine Learned Synthesizability Classification from AI Driven Retrosynthetic Planning ..... | 1 |
| SI-1: Retrosynthesis Prediction for Training Set Generation .....                                                                                 | 3 |
| SI-2: Machine Learning Classifiers for Estimation of Retrosynthetic Accessibility .....                                                           | 3 |
| SI-2.1: Example of the optimal architecture found by hyperparameter optimization for the ChEMBL dataset .....                                     | 3 |
| SI-2.2: Optimal Model Hyperparameters .....                                                                                                       | 3 |
| SI-2.2.1: Logistic Regression .....                                                                                                               | 3 |
| SI-2.2.2: Random Forest .....                                                                                                                     | 4 |
| SI-2.2.3 XGB Classifier .....                                                                                                                     | 4 |
| SI-2.2.4 Neural Network .....                                                                                                                     | 5 |
| SI-2.2.5 Parameters for NN ecfp counts with features .....                                                                                        | 5 |
| SI-2.2.6: Parameters for NN ecfp counts.....                                                                                                      | 6 |
| SI-2.2.7: Parameters for XGBoost ecfp counts .....                                                                                                | 6 |
| SI-2.2.8 Parameters for SA Score Logistic Regression.....                                                                                         | 6 |
| SI-2.2.9 Parameters for SC Score Logistic Regression .....                                                                                        | 6 |
| SI-2.2.10 Parameters for SYBA Logistic Regression .....                                                                                           | 6 |
| SI-3: Attempts at using SAScore, SCscore and SYBA.....                                                                                            | 6 |
| SI-3.1: GDBChEMBL.....                                                                                                                            | 6 |
| SI-3.2: GDBMedChem.....                                                                                                                           | 6 |

|                                                                                       |   |
|---------------------------------------------------------------------------------------|---|
| SI-4 Machine Learning Classifiers for Estimation of Retrosynthetic Accessibility..... | 7 |
| SI -5: Limitations of Template Based CASP Tools .....                                 | 8 |
| SI-5.1: Example Compound Similarity to Training Set .....                             | 8 |

## SI-1: Retrosynthesis Prediction for Training Set Generation

Refer to the attached .csv files for the training and test datasets.

Refer to the configuration file found in our GitHub repository for the settings used during the label generation process: <https://github.com/reymond-group/RAcore>

## SI-2: Machine Learning Classifiers for Estimation of Retrosynthetic Accessibility

SI-2.1: Example of the optimal architecture found by hyperparameter optimization for the ChEMBL dataset.

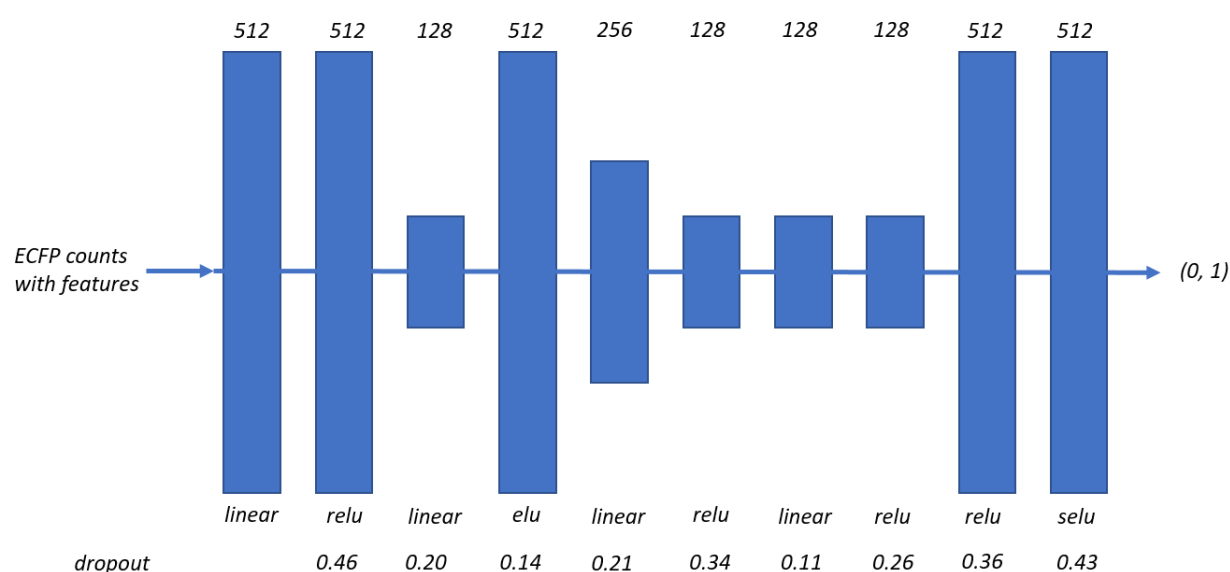

Optimal architecture found for the ChEMBL dataset using Optuna for hyperparameter optimization. The hyperparameters to optimize were, the number of layers, the size of the layers, the activation function, dropout rate, and the learning rate. Full details of the parameters found are given in the SI. As input for the model 2048 dimensional counted ECFPs with features and a radius of 3 were used, and as output the class label, solved or unsolved as obtained via retrosynthetic analysis using our CASP tool.

### SI-2.2: Optimal Model Hyperparameters

The following boundaries were used to train the classifiers:

#### SI-2.2.1: Logistic Regression

```
"algorithm": {"LogisticRegression": {
```

```
"solver": ["newton-cg", "lbfgs", "sag", "saga"],
```

```
"C": {
```

```
"low": 0.1,  
"high": 1.5 }
```

#### SI-2.2.2: Random Forest

```
"algorithm": {"RandomForestClassifier": {  
  "max_depth": {  
    "low": 10,  
    "high": 20  
  },  
  "n_estimators": {  
    "low": 10,  
    "high": 100  
  },  
  "max_features": ["sqrt", "log2"]  
}
```

#### SI-2.2.3 XGB Classifier

```
"algorithm": {"XGBClassifier": {  
  "max_depth": {  
    "low": 10,  
    "high": 20  
  },  
  "n_estimators": {  
    "low": 10,  
    "high": 100  
  },  
  "learning_rate": {
```

```

    "low": 0.05,
    "high": 0.2
  }
}

```

#### SI-2.2.4 Neural Network

```

"algorithm": {
  "DNNClassifier": {
    "layer_1": [128, 256, 512],
    "activation_1": ["relu", "elu", "selu", "linear"],
    "dropout_1": 0.1,
    "max_layers": 10,
    "layer_size": [128, 256, 512],
    "layer_activations": ["relu", "elu", "selu", "linear"],
    "layer_dropout": {"low": 0,
                      "high": 0.5},
    "learning_rate": {"low": 1e-5,
                      "high": 1e-1}
  }
}

```

#### SI-2.2.5 Parameters for NN ecfp counts with features

```

{"layer_1": 512, "activation_1": "linear", "num_layers": 10, "units_2": 512, "activation_2":
"relu", "dropout_2": 0.45834579304621176, "units_3": 128, "activation_3": "linear",
"dropout_3": 0.20214636121010582, "units_4": 512, "activation_4": "elu", "dropout_4":
0.13847113009081813, "units_5": 256, "activation_5": "linear", "dropout_5":
0.21312873496871235, "units_6": 128, "activation_6": "relu", "dropout_6":
0.33530504087548707, "units_7": 128, "activation_7": "linear", "dropout_7":
0.11559123444807062, "units_8": 128, "activation_8": "relu", "dropout_8":

```

```
0.2618908919792556, "units_9": 512, "activation_9": "relu", "dropout_9":  
0.3587291059530903, "units_10": 512, "activation_10": "selu", "dropout_10":  
0.43377277017943133, "learning_rate": 1.5691774834712003e-05}
```

#### SI-2.2.6: Parameters for NN ecfp counts

```
{"layer_1": 256, "activation_1": "selu", "num_layers": 2, "units_2": 128, "activation_2": "relu",  
"dropout_2": 0.15578695546915372, "learning_rate": 2.632240761263429e-05}
```

#### SI-2.2.7: Parameters for XGBoost ecfp counts

```
{"max_depth": 19, "n_estimators": 97, "learning_rate": 0.19984033197055842}
```

#### SI-2.2.8 Parameters for SA Score Logistic Regression

```
{"C": 0.18582521970918675, "solver": "lbfgs"}
```

#### SI-2.2.9 Parameters for SC Score Logistic Regression

```
{"C": 0.22237611805770982, "solver": "saga"}
```

#### SI-2.2.10 Parameters for SYBA Logistic Regression

```
{"C": 0.39649336266446344, "solver": "newton-cg"}
```

### SI-3: Attempts at using SAScore, SCscore and SYBA

#### SI-3.1: GDBChEMBL

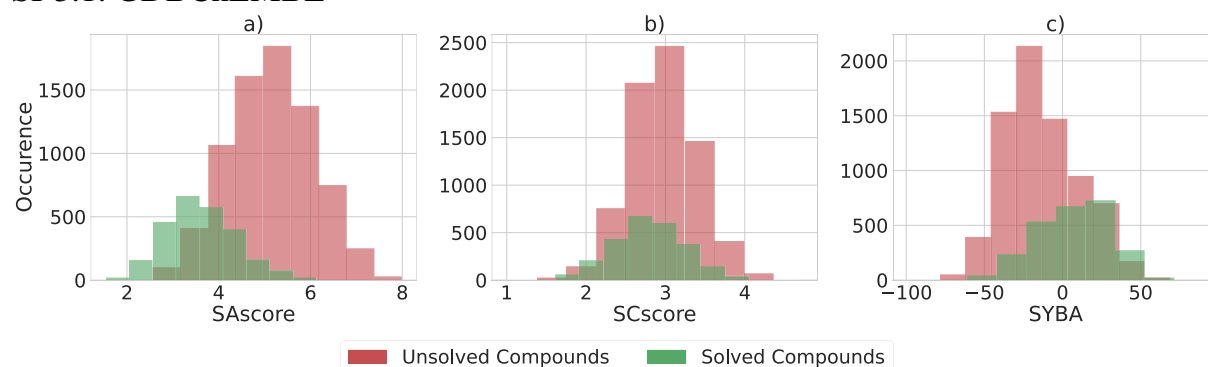

#### SI-3.2: GDBMedChem

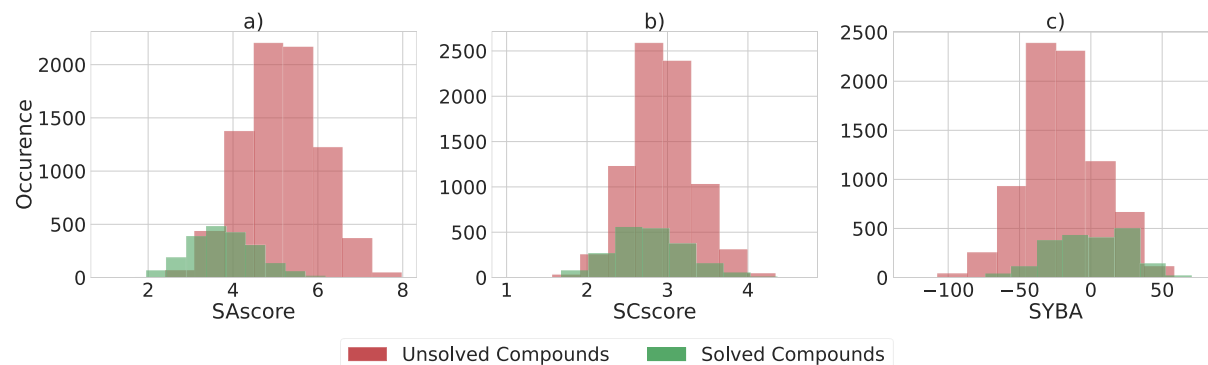

## SI-4 Machine Learning Classifiers for Estimation of Retrosynthetic Accessibility

| Dataset    | Model         | Descriptor                 | ROC-AUC | Accuracy | Precision | Recall | Average Linkage |
|------------|---------------|----------------------------|---------|----------|-----------|--------|-----------------|
| ChEMBL     | NN (RAScore)  | ECFP6 counts with features | 0.93    | 0.90     | 0.92      | 0.95   | 0.69            |
| ChEMBL     | NN            | ECFP6 counts               | 0.94    | 0.90     | 0.92      | 0.95   | 0.68            |
| ChEMBL     | XGB           | ECFP6 counts               | 0.95    | 0.91     | 0.92      | 0.96   | 0.65            |
| ChEMBL     | XGB           | ECFP6 counts with features | 0.95    | 0.90     | 0.91      | 0.96   | 0.62            |
| ChEMBL     | RF            | ECFP6 counts               | 0.90    | 0.83     | 0.82      | 0.99   | 0.30            |
| ChEMBL     | RF            | ECFP6 counts with features | 0.89    | 0.82     | 0.82      | 0.99   | 0.28            |
| ChEMBL     | NN            | SA score                   | 0.85    | 0.81     | 0.84      | 0.92   | 0.37            |
| ChEMBL     | Logistic      | SA score                   | 0.85    | 0.81     | 0.83      | 0.94   | 0.36            |
| ChEMBL     | Logistic      | SC score                   | 0.61    | 0.75     | 0.75      | 1.00   | 0.27            |
| ChEMBL     | NN            | SC score                   | 0.61    | 0.75     | 0.61      | 1.00   | 0.27            |
| ChEMBL     | Logistic      | SYBA score                 | 0.74    | 0.78     | 0.79      | 0.96   | 0.25            |
| ChEMBL     | NN            | SYBA score                 | 0.74    | 0.78     | 0.78      | 0.97   | 0.21            |
| ChEMBL     | -             | SAscore                    | 0.15    | -        | -         | -      | 0.17            |
| ChEMBL     | -             | SCscore                    | 0.39    | -        | -         | -      | 0.22            |
| ChEMBL     | -             | SYBA                       | 0.74    | -        | -         | -      | 0.17            |
| GDBChEMBL  | NN (GDBscore) | ECFP6 counts               | 0.93    | 0.87     | 0.76      | 0.73   | 0.64            |
| GDBChEMBL  | NN            | ECFP6 counts with features | 0.94    | 0.88     | 0.78      | 0.74   | 0.63            |
| GDBChEMBL  | XGB           | ECFP6 counts               | 0.94    | 0.89     | 0.81      | 0.73   | 0.61            |
| GDBChEMBL  | XGB           | ECFP6 counts with features | 0.94    | 0.88     | 0.80      | 0.71   | 0.61            |
| GDBChEMBL  | RF            | ECFP6 counts with features | 0.89    | 0.81     | 0.76      | 0.40   | 0.36            |
| GDBChEMBL  | RF            | ECFP6 counts               | 0.88    | 0.81     | 0.81      | 0.31   | 0.32            |
| GDBChEMBL  | -             | SAscore                    | 0.11    | -        | -         | -      | 0.26            |
| GDBChEMBL  | -             | SCscore                    | 0.38    | -        | -         | -      | 0.14            |
| GDBChEMBL  | -             | SYBA                       | 0.72    | -        | -         | -      | 0.17            |
| GDBMedChem | NN            | ECFP6 counts               | 0.93    | 0.88     | 0.75      | 0.64   | 0.64            |
| GDBMedChem | NN            | ECFP6 counts with features | 0.94    | 0.89     | 0.77      | 0.66   | 0.63            |
| GDBMedChem | XGB           | ECFP6 counts               | 0.94    | 0.89     | 0.78      | 0.64   | 0.61            |
| GDBMedChem | XGB           | ECFP6 counts with features | 0.94    | 0.89     | 0.79      | 0.64   | 0.61            |
| GDBMedChem | RF            | ECFP6 counts with features | 0.89    | 0.83     | 0.80      | 0.27   | 0.36            |
| GDBMedChem | RF            | ECFP6 counts               | 0.88    | 0.81     | 0.91      | 0.10   | 0.32            |
| GDBMedChem | -             | SAscore                    | 0.13    | -        | -         | -      | 0.22            |
| GDBMedChem | -             | SCscore                    | 0.39    | -        | -         | -      | 0.14            |
| GDBMedChem | -             | SYBA                       | 0.70    | -        | -         | -      | 0.17            |

# SI -5: Limitations of Template Based CASP Tools

## SI-5.1: Example Compound Similarity to Training Set

| Train Set                                                                           | Solved | Tanimoto | Test Set                                                                              |
|-------------------------------------------------------------------------------------|--------|----------|---------------------------------------------------------------------------------------|
| 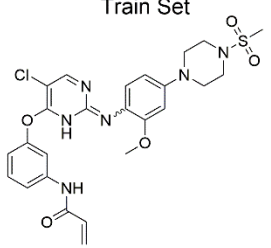   | 1      | 0.77     |    |
|    | 1      | 0.83     |    |
|   | 1      | 0.74     |   |
|  | 1      | 0.73     |  |
|  | 0      | 0.46     |  |
|  | 0      | 0.45     |  |
|  | 0      | 0.70     |  |
|  | 0      | 0.61     |  |
